# Supplementary material
Source: PubMed Central journal article supplement (PMC16924)
Supplement: pnas_97_17_9677__3.pdf [file pnas_97_17_9677__3.pdf]

1
**βββββ**
**αααααααααααα**
**βββ**

*M. tuberculosis* (1) -----MTEHLDVVIVGAGISGVSAAWHLQDRCPKSYA  
*R. rhodochrous* (1) MNGQHPRSVVTAPDATTGTTSYDVVVVVGAGIAGLYAIHRFRSQ--GLTVR  
*Acinetobacter* sp. (1) -----MSQKMDFDAIVIGGGFGGLYAVKKLRDEL-ELKVQ

**βββ**
100

*M. tuberculosis* (34) ILEKRESMGGTWDLF<sup>1</sup>FRYPGIRSDSDMY----TLGFRFRPWTGRQAIADG  
*R. rhodochrous* (49) AFEAAAGVGVWYWNRYPGARCDVESIDYSYSFSPLEQEWNWSEKYATQ  
*Acinetobacter* sp. (35) AFDKATDVAGT<sup>2</sup>WYWNRYPSALTDTE<sup>3</sup>THLYCYSWDKELQSLKIKKYVQG

101
150

*M. tuberculosis* (79) KPIL<sup>4</sup>EYVKSTAA<sup>5</sup>MYGIDRHIRFHHKVISADWSTAENRWTVHI-QSHGTL<sup>6</sup>S  
*R. rhodochrous* (99) PEILAYLEHVADRFDLRRDIRFDTRVTS<sup>7</sup>AVLDEGLRWTVRT----DRGD  
*Acinetobacter* sp. (85) PDV<sup>8</sup>RKYLQOVAEKHDLKKS<sup>9</sup>YQFN<sup>10</sup>TAVQSAHYNEADALWEVTT---EYGD

151
200

*M. tuberculosis* (128) ALTCEFLFLCSGYNYDEGYSPRFAGSEDFVGPIIHPQHWPED-LDYDAK  
*R. rhodochrous* (145) EVSARFLVVAAGPLSNAN--TPAFDGLDRFTGDIVHTARWPHDGVDF<sup>11</sup>TGK  
*Acinetobacter* sp. (131) KYTARFLIT<sup>12</sup>ALGLLSAPN--LPNIKGINQFKGELHHTSRWPD<sup>13</sup>-VSFEGK

**βββββ**
**αααααααααααα**
**βββββ**
250

*M. tuberculosis* (177) NIVVIGSGAT<sup>14</sup>AVTLVPALADSGAKHVTMLQRSPTYIVSQ---PDRD---  
*R. rhodochrous* (193) RVGVIGTGS<sup>15</sup>SGIQSIP<sup>16</sup>IAEQ-AEQLFV<sup>17</sup>QRSANYSIPAGNVPLDDATR  
*Acinetobacter* sp. (178) RVGVIGTGS<sup>18</sup>TGVQVITAVAPL-AKHLTV<sup>19</sup>QRS<sup>20</sup>AQY<sup>21</sup>SVPIGNDPLSEEDV

251
300

*M. tuberculosis* (220) -----GIAEKLNRWLPETMAYTAVRW-KNVL<sup>22</sup>RQAAVYS  
*R. rhodochrous* (241) AEQKANYAERRRLSRESGGSPHRPHKSALEVSE<sup>23</sup>EER-RAVYEERWKL<sup>24</sup>G  
*Acinetobacter* sp. (226) KKI<sup>25</sup>KDNYDKIWDGVWNSALAFGLNESTV<sup>26</sup>PAMSVSAEER-KAVFEKAWQ<sup>27</sup>TG

301
350

*M. tuberculosis* (252) A----CQKW<sup>28</sup>PRMRKMFLSLIQRQLPEG---YDVRKHFGPHYN<sup>29</sup>PWD--  
*R. rhodochrous* (290) G--VLFSKAFPDQLTDPAA<sup>30</sup>NDTARAFWEEKIRAVVDDPAVAEL<sup>31</sup>LPKDHA  
*Acinetobacter* sp. (275) GGRFRMFET<sup>32</sup>FGDIATNMEANIEAQNFIK<sup>33</sup>GKIAEIVKDP<sup>34</sup>IAQKLM<sup>35</sup>PQD--

351
400

*M. tuberculosis* (291) ---QRLCLVPNGD-LFRAIRHGKVEV<sup>36</sup>VTDTIERFTATGIRLNSGRELPAD  
*R. rhodochrous* (338) IGAKRIVTDSGYYETYN<sup>37</sup>RDNVELVDLRSTPIVGMDET<sup>38</sup>GIVT-TGAHYDLD  
*Acinetobacter* sp. (323) LYAKRPLCD<sup>39</sup>SGYYNTFN<sup>40</sup>RDNVRL<sup>41</sup>EDVKANPIVEITENG<sup>42</sup>VKLENGDFVELD

401
450

*M. tuberculosis* (337) I<sup>43</sup>IITATGLNLQ<sup>44</sup>LFGGATATIDGQQ-----VDIT<sup>45</sup>TMAYKGMMLSGIP<sup>46</sup>NM  
*R. rhodochrous* (387) MIVL<sup>47</sup>ATGFDA<sup>48</sup>MTGSLDKLEIVGRGRTL<sup>49</sup>KETWAAGPRTYLGLGIDG<sup>50</sup>PNF  
*Acinetobacter* sp. (373) MLI<sup>51</sup>CATGFDA<sup>52</sup>VDGNYVRMDIQK<sup>53</sup>NGLAMKDYWKEG<sup>54</sup>PSSYMGVTVNNY<sup>55</sup>PNM

451
500

*M. tuberculosis* (381) AYT<sup>56</sup>VG<sup>57</sup>YTN---ASWTLKADLVSEFV<sup>58</sup>CRL<sup>59</sup>LLY<sup>60</sup>MDDNGFD<sup>61</sup>TVVVE-RPGSD  
*R. rhodochrous* (437) FNL<sup>62</sup>TG<sup>63</sup>PGSPSVLANMVLHSELHVD<sup>64</sup>WVADAIAYLDARGAAGIEGT-PEAVA  
*Acinetobacter* sp. (423) FMV<sup>65</sup>LGPNGP--FTNL<sup>66</sup>P<sup>67</sup>PSIESQ<sup>68</sup>VEWISDTIQ<sup>69</sup>YTVENNVESIEAT-KEAEE
