# Supplementary material
Source: PubMed Central journal article supplement (PMC16924)

**A**

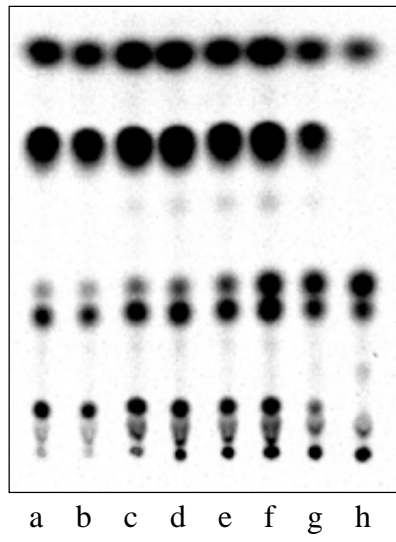

**B**

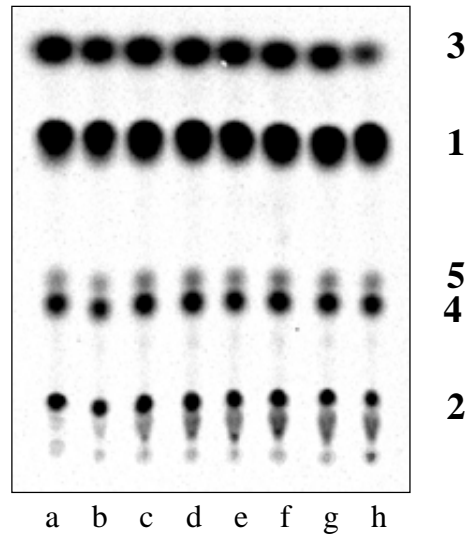

Supplement: pnas_97_17_9677__4.pdf [file pnas_97_17_9677__4.pdf]
